# Supplementary material for: One-pot green synthesis of graphene oxide/gold nanocomposites as SERS substrates for malachite green detection
Source: Royal Society of Chemistry journal article supplement (doi:10.1039/c3an00018d), 2013-01-01
Supplement: c3an00018d.pdf [file c3an00018d.pdf]

## Electronic Supplementary Information

# One-pot green synthesis of graphene oxide/gold nanocomposites as SERS substrates for malachite green detection

Wenliang Fu,<sup>a</sup> Shujun Zhen\*<sup>a</sup> and Chengzhi Huang\*<sup>a,b</sup>

<sup>a</sup>*Education Ministry Key Laboratory on Luminescence and Real-Time Analysis, College of Chemistry and*

*Chemical Engineering, and <sup>b</sup> College of Pharmaceutical Sciences, Southwest University, 400715 Chongqing, P.R.*

*China*

## Characterization of GO/AuNPs hybrids

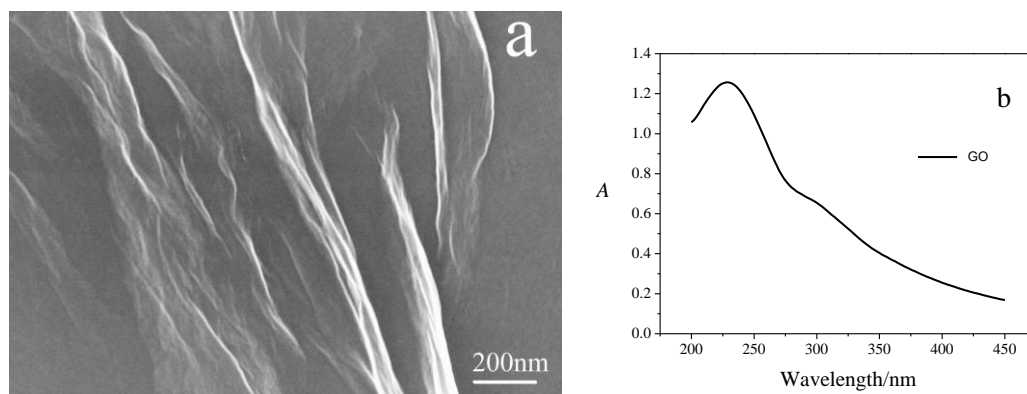

**Fig. S1** Features of as-prepared GO. (a) Scanning electron microscopy image, (b) UV-vis absorption spectrum.

Two absorption peaks at 228 nm and 300 nm, which attributed to the  $\pi$ - $\pi^*$  transition of carbon double bonds and  $n$ - $\pi^*$  transition of carbonyl groups respectively.<sup>1</sup>

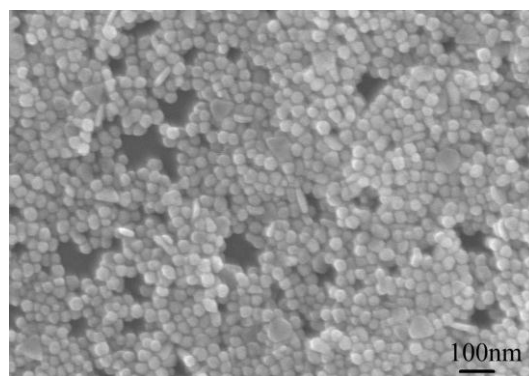

**Fig. S2** Scanning electron microscopy of gold nanoparticles synthesized with the tyrosine as reducing agents in the pH 7.0 without GO.

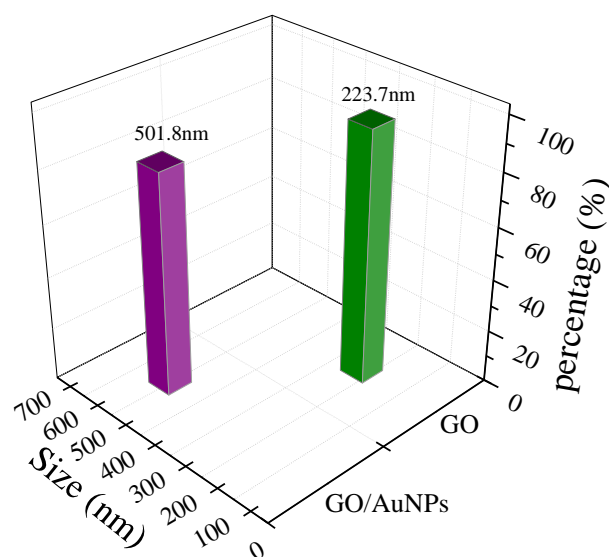

**Fig. S3** DLS measurements of GO and GO/AuNPs hybrids in the aqueous solution. 95.8% pure GO had the main size distribution of 224 nm, while GO/AuNPs hybrids had main size distribution of 502 nm. The obvious change of size distribution suggested that the GO/AuNPs hybrids indeed formed in solution.

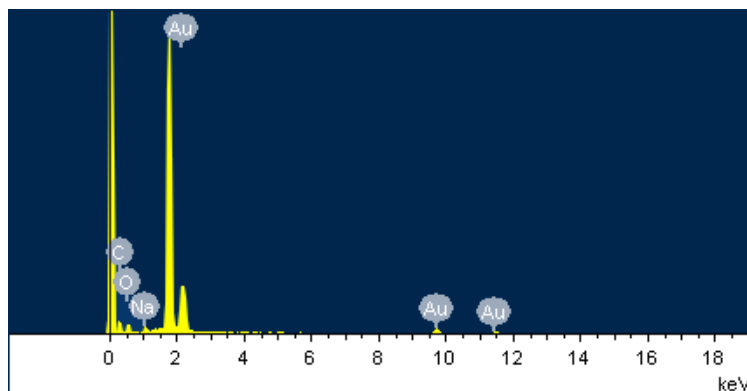

**Fig. S4** Energy-dispersive X-ray spectrum analysis of GO/AuNPs hybrids.

#### REFERENCE

1. G.-h. Moon, H.-i. Kim, Y. Shinc and W. Choi, *RSC Adv*, 2012, **2**, 2205.
